# Supplementary material for: A Microwell-Based Intestinal Organoid-Macrophage Co-Culture System to Study Intestinal Inflammation
Source: MDPI journal article supplement (doi:10.3390/ijms232315364), 2022-12-06
Supplement: s1 [file s1]

# Supplementary Material

## A Microwell-Based Intestinal Organoid-Macrophage Co-Culture System to Study Intestinal Inflammation

Panagiota Kakni <sup>1</sup>, Roman Truckenmüller <sup>1</sup>, Pamela Habibović <sup>1</sup>, Martijn van Griensven <sup>2</sup> and Stefan Giselbrecht <sup>1,\*</sup>

### Supplementary table

Table S1. Description of the culture conditions used for the experiments

| Name                                | Culture Conditions                                                                                   |
|-------------------------------------|------------------------------------------------------------------------------------------------------|
| MIO                                 | Mouse intestinal organoids cultured in microwells                                                    |
| RAW                                 | RAW cells cultured in microwells                                                                     |
| TNF- $\alpha$ untreated             | MIO treated with TNF- $\alpha$ for 5 days                                                            |
| TNF- $\alpha$ neutralizing antibody | MIO treated with TNF- $\alpha$ for 5 days and TNF- $\alpha$ neutralizing antibody from day 3 onwards |
| TNF- $\alpha$ removal               | MIO treated with TNF- $\alpha$ until day 3 and then remove TNF- $\alpha$ from the culture medium     |
| dMIO+RAW untreated                  | Direct co-culture of MIO with RAW for 5 days                                                         |
| indMIO+RAW untreated                | Indirect co-culture of MIO with RAW for 5 days                                                       |
| indMIO+RAW removal                  | Indirect co-culture of MIO with RAW and on day 3 removal of RAW cells                                |

### Supplementary figures

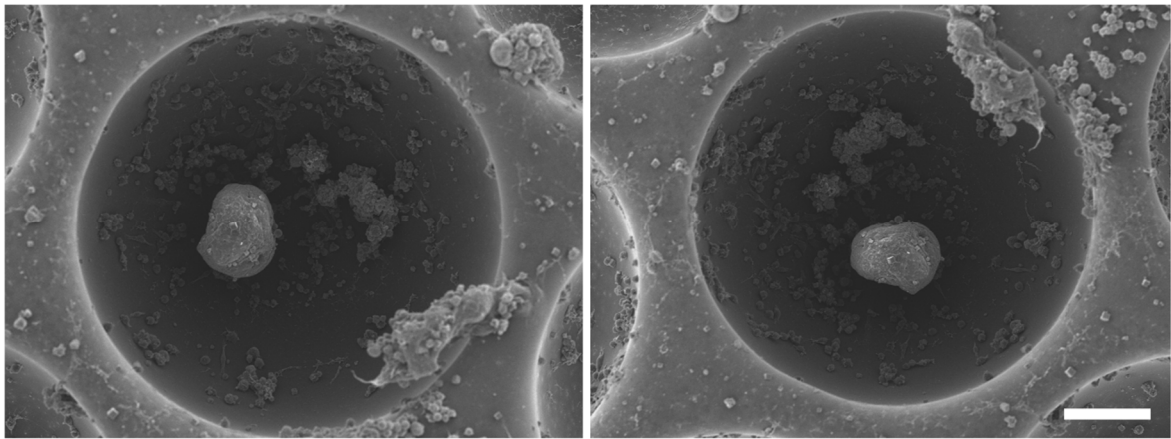

Figure S1. SEM images demonstrating the direct co-culture of intestinal organoids with RAW 264.7 cells. Scale bar represents 100  $\mu$ m.

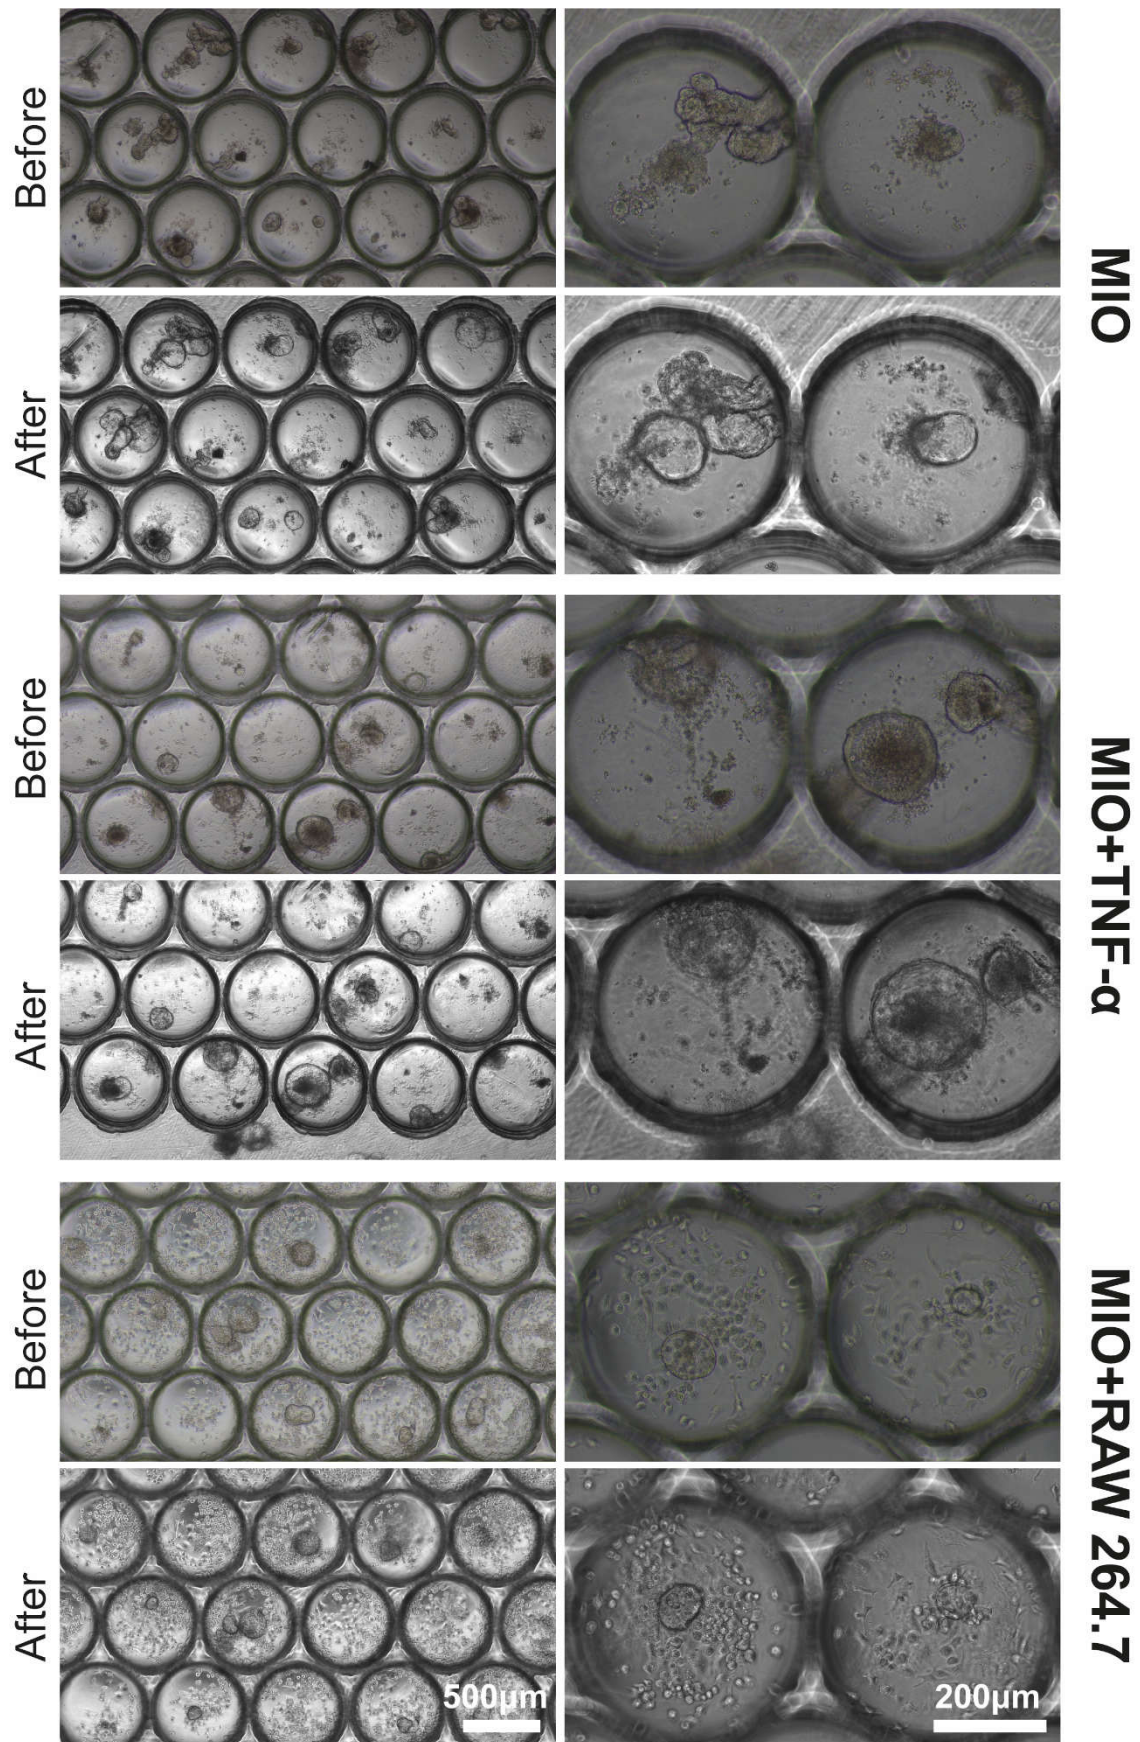

**Figure S2.** Bright-field images demonstrating the swelling of organoids upon treatment with 5  $\mu$ M Forskolin for 3 hours.

### **Supplementary video**

**Video S1.** Time-lapse imaging of the direct co-culture of intestinal organoids with 50,000 RAW 264.7 cells. Single plane images were taken every 1 h for 3 days.
